1     **Aptamer-based biosensor for food allergen determination**  
2     **using graphene oxide/gold nanocomposite on a paper-**  
3     **assisted analytical device**

4             Amit Tah<sup>a,b</sup>, Jorge M. Olmos Cordero<sup>a,b</sup>, Xuan Weng<sup>a</sup>, Suresh Neethirajan<sup>a\*</sup>

5

6     <sup>a</sup>BioNano Laboratory, School of Engineering, University of Guelph, Guelph N1G 2W1, Canada

7     \*Corresponding author.

8     E-mail address: sneethir@uoguelph.ca (S. Neethirajan)

9     <sup>b</sup>Equal contributions from the authors.

10

11

12

13

14

15

16

17

18

## 19 **Abstract**

20 The detection of allergens in food are currently conducted by techniques that are time-consuming  
21 and complicated which can deter consistent sampling for allergens, which could potentially  
22 cause an anaphylactic shock in the consumer by cross-contamination. The need for a technique  
23 that is rapid, on-site, cost-effective, disposable, highly sensitive and accurate to identify these  
24 molecules urges the development of a point-of-care device. The aim of this work is to develop a  
25 microfluidic paper-assisted analytical device ( $\mu$ PAD) using hydrophobic channels, set by a wax  
26 printer on filter paper, and functionalized gold nanoparticles (AuNP) to help identify the  
27 allergens arachin (Ara h 1) for peanuts,  $\beta$ -lactoglobulin ( $\beta$  LG) for milk, and tropomyosin (Pen a  
28 1) for shrimp and other shellfish presence by a colorimetric test. Synthesized AuNP were  
29 conjugated with biotinylated aptamers, using the biotin-streptavidin interaction, to make the  
30 specific detection of target allergens. Functionalized AuNP are incubated with the sample and  
31 are absorbed by graphene oxide (GO), creating GO-AuNP complexes, if the aptamers have not  
32 become structured due to conjugation with allergenic proteins. The  $\mu$ PAD device is used to filter  
33 the resultant mixture which provides superior sensitivity to detect the allergens present down to  
34 the nanogram range (allergens were measured from 25 nM – 1000 nM with a LOD of 7.8 nM,  
35 12.4 nM and 6.2 nM for peanut, milk and shrimp allergens respectively), in contrast to the  
36 microgram range of commonly used enzymatic immunoassays. The simple color indicator,  
37 varying from clear to pink in the presences of allergens allows the readout to be utilized without  
38 the need for highly specific equipment or training. Alternatively, the results can be quantified by  
39 taking a picture and measuring the color. This presented  $\mu$ PAD can provide results in real time  
40 and has the potential to become a rapid, low-cost, and accurate portable point-of-care device to  
41 avoid cross-reactivity of food-borne allergens.

42 **Keywords:** Aptamers; Biosensors; Paper-based microfluidics; Graphene oxide; Food-borne  
43 allergens; Nanobiosensing platform.

## 44 1. Introduction

45 Food allergies are caused when the immunological system of a person overreacts adversely  
46 to consumed proteins found in the meal denoted as allergens (AAFA, 2017). The symptoms an  
47 individual experience from an allergic reaction vary from one to another and can range from  
48 mild to severe. Unfortunately, the causes for allergies are not yet completely understood but the  
49 mechanisms are reported and thus allow for precautionary measurements to be taken (Smith,  
50 2013). There is no current cure to allergies thus the allergic reactions are prevented by avoiding  
51 contact with the food, controlling the symptoms (taking antihistamines, epinephrine) and allergy  
52 injection therapy (CDC).

53 FDA and other governmental bodies identify 8 major allergens that affect American society  
54 which include milk, eggs, fish, crustacean shellfish, tree nuts, wheat and soy (Center for Food  
55 Safety and Applied Nutrition, 2017). However, major allergens can vary depending in the  
56 population and the region of the world thus they are the ones considered to evoke a reaction in  
57 more than 50% of allergic patients (Kallós et al., 1978). In the United States alone 15 million  
58 individuals are sensitive to the various food borne allergens (FARE, 2016). To prevent accidental  
59 reaction sensitive individuals must rely on manufactures, governmental regulation and imposing  
60 strict diet on themselves to lower the chance of a response due to allergenic material (World  
61 Allergy Organization, 2011). In this study, peanut, milk and shellfish were selected due to being  
62 the most common food allergens in children in the U.S. with an incidence of 25.5%, 21.1% and  
63 17.2%, respectively. It is important to mention that out of the children some had reported having  
64 a history of a severe reaction and 30.4% were allergic to more than one allergen. Ara h 1 was

65 chosen as the peanut allergen due to its abundant 23 independent IgE-binding epitopes (Zhuang  
66 and Dreskin, 2013). Choosing a milk allergen is not as simple given that most of cow's milk  
67 proteins have potential allergenic properties thus  $\beta$ -lactoglobulin was chosen for its abundance  
68 (Natale et al., 2004). Tropomyosin was chosen for shrimp detection given that it is very frequent  
69 and it provides a simultaneous test for contamination with dust mites and cockroaches for people  
70 who are also sensitive to arthropods (Pascal et al., 2015). With so many sources and individuals  
71 varying sensitivity, reactionary based methods like EpiPens, are not the most ideal mechanism  
72 for helping those afflicted. To meet the need for proactive measures which can be utilized  
73 directly by consumers on-site field testing allergen detection tool is required.

74 The advent of paper-based microfluidic, which utilizes the natural capillary action of  
75 cellulosic substrates to perform rapid diagnostic test, may change this and help bring the Point-  
76 of-Care testing (POCT) to the masses (Martinez et al., 2010). This new type of diagnostic system  
77 provides a methodology which can help take microfluidics from the lab to the consumers. The  
78 advantages of paper-based microfluidics includes the low cost, ease of manufacturing, the  
79 possibility of simple multiplexing, small sample/reagent consumption and capability for  
80 development of a three dimensionally structured diagnostic tool (Martinez et al., 2007). These  
81 advantages allow paper based devices to deliver on the promises that original lab-on-a-chip  
82 microfluidic put forward, the development of POCT for the entire world.

83 For this device, the main sensing mechanism incorporates the use of aptamers to accurately  
84 identify the allergenic proteins. Aptamers are short single-stranded DNA or RNA  
85 oligonucleotides that have the ability of binding to specific molecules showing an activity similar  
86 to antibodies. The structure of aptamers contains complementary base pairs that allow a stable  
87 secondary structure to form a rigid functional structure to bind with their target molecule. There

88 have been aptamers developed to identify metal ions, small organic molecules, peptides, proteins,  
89 viruses, bacteria, and whole cells (Keefe et al., 2010). Aptamers, thus prove to have advantages  
90 on detection over antibodies by being smaller in size (6-30 kDa or 20-100 nt), having a high  
91 affinity independent from the number of epitopes in the target molecule, allowing to identify  
92 single point mutation and isomers, detecting a wider range of molecules, rapid production, low  
93 variation between batches, low risk of contamination, long stability, having the ability to be  
94 modified, and low to none immunogenicity (BasePair Biotechnologies, 2017; Zhou and Rossi,  
95 2016). They can be used in biosensors with a higher density than antibodies and have been  
96 proven to be reusable without changes in specificity or sensitivity (Lakhin et al., 2013).

97 In our study, aptamers are conjugated to gold nanoparticles (AuNP), we then utilize specific  
98 single stranded DNA (ssDNA) absorption properties of graphene oxide (GO) with a paper device  
99 to create a simple colorimetric sensor for food allergen detection. These two materials, AuNP  
100 and GO, have been highly exploited for the development of POCT in recent years thanks to their  
101 fantastic properties and interactions. AuNP have very useful optical and electrical properties,  
102 their strong and specific Surface Plasmon Resonance absorption and extremely high extinction  
103 coefficients allows them to be ideal reporters for target analytes with low cost equipment or with  
104 the naked eye (Alves et al., 2016). GO is also a wonder material in recent years thanks to its  
105 ability to quench fluorophore-labeled bio-recognition molecules, such as labelled antibodies,  
106 which when in the presence of their target reverse the quenching and re-release their fluorescent  
107 signal due to Förster resonance energy transfer (FRET) (Lu et al., 2015). It also has been shown  
108 to interact with a variety of biological molecules such as amino acids, peptides, proteins and  
109 most importantly for this application ssDNA (Li et al., 2014, 2012). It has been shown that  
110 ssDNA has a special adsorption interaction with GO, forming a complex in which the

111 functionalized AuNP have a bridging effect between different layers of graphene oxide through  
112 pi-pi stacking thanks to the ssDNA aptamers bound to them. In contrast, double stranded DNA  
113 or highly structure molecules of DNA do not show the formation of pi-pi interaction with GO, as  
114 their complex-rigid structure prevents the pi-pi interaction from occurring with GO (Li et al.,  
115 2014). By tagging ssDNA aptamers, which are designed to detect target allergens, to AuNP it is  
116 possible to create a colorimetric biosensor which can produce an output visible to the naked eye.  
117 Combining this with a simple paper based device, it allows an easy and fast quantifiable  
118 assessment of allergen concentration. The mechanism of the presented biosensor and resultant  
119 reaction for allergenic proteins in food is shown in Fig. 1.

## 120 **2. Materials and methods**

### 121 *2.1. Materials*

122 Tetrachloroauric(III) acid ( $\text{HAuCl}_4 \cdot 3\text{H}_2\text{O}$ ), trisodium citrate ( $\text{Na}_3\text{C}_6\text{H}_5\text{O}_7 \cdot 2\text{H}_2\text{O}$ ),  
123 streptavidin,  $\beta$ -lactoglobulin ( $\beta\text{LG}$ ), phosphate buffer saline (1x PBS; 0.01 M phosphate buffer,  
124 0.0027 M potassium chloride, 0.137 M sodium chloride, pH 7.4), graphene oxide, bovine serum  
125 albumin (BSA), sodium chloride ( $\text{NaCl}$ ), magnesium chloride ( $\text{MgCl}_2$ ),  
126 tris(hydroxymethyl)aminomethane (Tris,  $\text{C}_4\text{H}_{11}\text{O}_3\text{N}$ ), ethylenediaminetetraacetic acid (EDTA,  
127  $\text{C}_{10}\text{H}_{16}\text{O}_8\text{N}_2$ ), mixed cellulose ester filters (MCE, 0.45  $\mu\text{m}$ ), boric acid ( $\text{H}_3\text{BO}_3$ ), sodium  
128 hydroxide ( $\text{NaOH}$ ), Tween 20 and Whatman chromatography paper (cellulose, 15 cm x 100 m)  
129 were purchased from Sigma-Aldrich Canada (Burlington, ON, Canada). Arachin (Ara h 1) and  
130 tropomyosin (Pen a 1) were purchased from Indoor Biotechnologies. Aptamers were synthesized  
131 by Integrated DNA Technologies (Coralville, Iowa, USA). The sequence of the aptamers is listed  
132 in the Table 1.

## 133 2.2. *Equipment*

134 TEM imaging (Tecnai G2 F20) was employed to obtain the micrographs. For the spectral  
135 scanning, Cytation 5 (BioTek), and Cary 100 UV-Vis (Agilent) were used. Dynamic light  
136 scattering measurements were conducted using Brookhaven 90plus Particle Size Analyzer  
137 (Brookhaven Instruments Corporation). The  $\mu$ PAD's hydrophobic channels were constructed  
138 with the wax printer Colorcube 8580 (Xerox) and the hot plate (Sci Logex MS7-H550-S). The  
139 samples were centrifuged on Sorvall ST 40 R (ThermoFisher Scientific). The aptamers were  
140 heated in Precision Water Baths 280 (ThermoFischer Scientific). Incubations took place in the  
141 Incushaker mini (Southwest Science). Milli-Q water was used in all the experiments (0.055  
142  $\mu$ S/cm).

## 143 2.3. *Gold nanoparticles synthesis*

144 Gold nanoparticles were prepared using Turkevich's method (Turkevich et al., 1951). A 100  
145 mL of  $\text{HAuCl}_4 \cdot 3\text{H}_2\text{O}$  (1 mM) were boiled while stirring in a hot plate with a magnetic bar. Then  
146 10 mL of  $\text{Na}_3\text{C}_6\text{H}_5\text{O}_7 \cdot 2\text{H}_2\text{O}$  38.8 mM were added. The reaction was left to boil for 10 minutes  
147 until the color changed from yellow to black to deep red wine. AuNP were left at room  
148 temperature for cooling down, prior to filtration with the MCE membranes. It was required for  
149 the nanoparticles to be covered from light and kept at 4°C to ensure their stability. The  
150 nanoparticles have a SPR peak at 521 nm indicating a 15-nm diameter size which is in  
151 correspondence with literature (Haiss et al., 2007). Theoretical calculation state that the  
152 synthesised particles are expected to be dispersed as a 1.1 nM concentration, which was  
153 calculated with an estimated extinction coefficient of  $2.18 \times 10^8$  (Haiss et al., 2007).

154 *2.4. Streptavidin conjugation (AuNP-SA)*

155 Thawed 1 mg/mL streptavidin was diluted to 50 µg/mL in 400 µL of borate buffer (0.1 M,  
156 pH 7.4). Conjugation with 600 µL of AuNP was performed at 4°C in moderate shaking for 30  
157 minutes. To remove the unbound streptavidin, AuNP-SA were centrifuged for 40 minutes at  
158 4500 rpm and 4°C. The supernatant was discarded and the pellet was resuspended in 1x PBS. A  
159 second wash was performed in the same conditions. The final resuspension was made in 100 µL  
160 of PBS (Lim et al., 2012).

161 *2.5. Aptamer functionalization and conjugation (AuNP-SA-M/P/S)*

162 Lyophilized aptamers were centrifuged for a pulse and then resuspended in TE buffer (10  
163 mM Tris, 0.1 mM EDTA, pH 7.5) as per the protocols provided by Integrated DNA  
164 Technologies to 100 µM. The aptamers were incubated at room temperature for 30 minutes and  
165 vortexed. Afterwards, the aptamers were pulsed at 10,000 g for 2 seconds and aliquoted to be  
166 preserved at -20°C. Prior to be used, aptamers were diluted to 50 nM in 100 µL of folding buffer  
167 (1 mM MgCl<sub>2</sub>, 1x PBS) and denatured at 90°C for 5 minutes. They were let to cool down at  
168 room temperature for 15 minutes. Streptavidin coated gold nanoparticles were mixed with  
169 aptamers at room temperature for 30 minutes under gentle mixing. Excess aptamers were  
170 removed by centrifugation for 15 minutes at 6000 rpm and 4°C. The pellet was resuspended in  
171 1x PBS, repeating the washes thrice (Weng and Neethirajan, 2016). Conjugated AuNP-SA-  
172 M/P/S were left for 16 hours to age at 4°C.

173 *2.6. Graphene oxide absorption of functionalized AuNP (AuNP-SA-M/P/S + GO)*

174 One of the critical mechanisms is the absorption of ssDNA with the usage of GO after the  
175 functionalized AuNP are incubated with a sample. Functionalized AuNP which have not had  
176 interaction of the aptamers with allergenic proteins are absorbed and form soft complexes. A



177 total of 100  $\mu\text{L}$  of nanoparticles were mixed with 0.02 mg/mL graphene oxide of which is  
178 extensively sonicated for 30 minutes before usage.

### 179 *2.7. Paper-based analytical device*

180 For this device, paper tests were made on Whatman chromatography paper with designs from  
181 Inkscape (0.92, The Inkscape Project, open-source program) using Colorcube wax printer. The  
182 paper coated with the device was heated in the hot plate at  $170^{\circ}\text{C}$  for 2 minutes to create the  
183 hydrophobic channels using a glass slide to cover the paper system (Lee and Gomez, 2017). The  
184 paper was cooled down prior to loading of the supernatant of the AuNP-Apt + GO complex and  
185 solution. The folded paper system is now ready to direct and channel small volumes of the  
186 supernatant to filter and display the testing results.

### 187 *2.8. Characterization and validation*

188 The physical diameter of the nanoparticles was determined by analyzing TEM micrographs  
189 with ImageJ (Schneider et al., 2012). 20  $\mu\text{L}$  of diluted samples were placed on copper grids and  
190 let sit overnight to be absorbed before imaging with the electron microscope. The analysis of the  
191 images included applying a FFT Bandpass Filter making large structures down to 20 pixels and  
192 small structures up to 5 pixels. Then the image was adjusted using the threshold tool and the  
193 particles' area was analyzed with a circularity above 0.3.

194 Dynamic Light Scattering (DLS) measurement was taken by adding 200  $\mu\text{L}$  of filtered  
195 samples in deionized water in the cuvettes and diluting as the count rate reach an approximate  
196 value of 400 kcps.

197 Absorbance was measured using Cytation 5 or Cary 100 using a 96-well plate or cuvettes. A  
198  $10\times$  dilution factor was used for all scans unless otherwise noted, all necessary graphs will show

199 the dilution correct values. Every step of the conjugation was verified with data obtained in  
200 Cytation 5 and data was further processed as necessary.

### 201 **3. Results and discussion**

#### 202 *3.1.Characterization of functionalized AuNP*

203 To demonstrate that the biomolecules were being attached to AuNP, TEM images and DLS  
204 measurements were acquired. For characterization of the mechanism, the data represented below  
205 is with the conjugation of Beta-Lacto Globulin specific aptamer. Each conjugation step was  
206 expected to occur on the surface of the AuNP without causing seeding effects, or a change in  
207 morphology. Nanoparticles preserved their spherical morphology and the average diameter (~14  
208 nm) from AuNP upon conjugation with SA and biotinylated aptamers, respectively (Fig. 2). The  
209 hydrodynamic radii were obtained with the use of DLS giving values of 24.2 nm, 45.7 nm, and  
210 58.4 nm for AuNP, AuNP-SA, and AuNP-SA-M respectively. Unlike the TEM which is unable  
211 to visually image the conjugated proteins and ssDNA, the DLS analysis shows an increase in the  
212 hydrodynamic radii from each functionalization. Zeta analysis values were also obtained giving  
213 values of -72.41, -38.74 and -46.54 for AuNP, AuNP-SA, and AuNP-SA-M/P/S, respectively.  
214 The increase in absolute potential seen when AuNP-SA are further functionalized with the  
215 aptamer shows a change in the surface morphology with a more negative molecule, which  
216 further attributes to the biotinylated aptamer binding with the SA (D'Agata et al., 2017; Weng  
217 and Neethirajan, 2016). From Fig. 2F, spectral scanning shows SPR peaks of conjugated 14 nm  
218 AuNP from 520 nm to 531 nm when covered with SA and to 536 nm when aged aptamers were  
219 absorbed onto SA. The adsorption of protein on to the surface causes a change in the surface  
220 morphology and therefore effects the scattering of the particles. The well-known optical  
221 characteristics, which were first systematically explained by Mie (1908), describe how the

222 localized environment affect these properties. As gold has a strong Surface Plasmon Resonance,  
223 the shift of the peak can be directly correlated to a change in the localized refractive index.  
224 Therefore, a shift in the spectral peak of gold can be a correspondence to a new molecule which  
225 interferes with the natural gold Surface Plasmon Resonance peak. The introduction of the protein  
226 SA and its electrostatic adoption onto the surface causes this change in the local refractive index,  
227 which in turn causes the shift of the spectral absorbance (Pollitt et al., 2015). The second shift is  
228 caused by the introduction of the biotinylated aptamers, which directly bind to the SA, leading to  
229 a change in the SA localized refractive index (D'Agata et al., 2017; Pollitt et al., 2015). Inserts  
230 on Fig. 2A, 2B & 2C demonstrates the diameter distribution of the functionalized AuNP from the  
231 processed micrographs to ensure that the peak shift to 536 nm does not correspond to  
232 flocculation but rather to surface biomolecule addition. Using a combination of DLS analysis,  
233 spectral scanning and TEM studies, a determination that surface modification of the  
234 nanoparticles due to the conjugation of the bio-molecules (SA and aptamers) has been  
235 successful, creating stable and fully functional nanoparticles for the detection of allergens.

236 Fig. 2D and 2G show and explain the effect of nanoparticles being bound to sheets of  
237 graphene oxide, creating bridges between sheets, resulting in the complexes seen in Fig. 2D. As  
238 explained previously, the pi-pi stacking interaction between the different layers of graphene  
239 oxide due to the functionalized AuNP only readily occurs when the aptamers are unstructured  
240 (Park et al., 2014; Wang et al., 2011; Wu et al., 2011). As no allergenic proteins are present,  
241 most nanoparticles have been removed from solution, as seen from the spectrographs of the  
242 supernatant in Fig. 2G. The background layer of graphene oxide and the implanted nanoparticles  
243 in Fig. 2D further support this assessment of interaction between the nanoparticles.

244

245

### 246 *3.2. Optimization*

247 The proposed mechanism has several critical steps that can be changed to improve the  
248 reliability, reproducibility and maximize the signal that is produced. The first study was  
249 assessment of different nanoparticles synthesis methods to create various mean diameters.  
250 Turkevich's method (Kimling et al., 2006) was finally chosen due to yielding consistent sizes  
251 and bigger particles than Martin's method (Low and Bansal., 2010) thus proving to have enough  
252 surface area to chemisorb SA. Based on previous studies of SA, it was estimated that between 20  
253 nm<sup>2</sup> ~ 40 nm<sup>2</sup> of surface area is required for electrostatic adsorption of SA (Bayer et al., 1990).  
254 As stated above, the simple and consistent Turkevich method provided a nanoparticle of  
255 consistent size with ample surface area for adsorption of SA molecules. Based on TEM, there  
256 was an estimated average available surface area of approximately 620 nm<sup>2</sup>. Next, choosing the  
257 correct working buffer became an important condition when conjugating our functionalized  
258 AuNP; PBS was only used after ensuring AuNP had the critical concentration of SA thus making  
259 the first conjugation in borate buffer non-saline mandatory (Geneviève et al., 2007). This was  
260 because borate buffer (0.1 M pH 7.4, 0.01 M pH 7.4 and 0.1 M pH 6.4) did not have any adverse  
261 effect on AuNP; however, PB 1× pH 7.4 and SC (sodium citrate) 1× pH 7.0 cause instability and  
262 eventual flocculation of the nanoparticles. This prevented any interference from occurring when  
263 the first functionalization with SA occurred. The critical concentration of SA was determined  
264 with the use of a salting flocculation test (Geneviève et al., 2007) and the stability verified by the  
265 SPR peak shift (Lim et al., 2012). The monolayer production test and optimization data can be  
266 seen in Fig. 3A and 3B, resulting in the optimum concentration to provide a monolayer of SA for  
267 AuNP to be 50 µg/mL of SA. To optimize the aptamer concentration, we first theoretically

268 calculated the minimum amount required for total coverage of the SA cover AuNP by the  
269 method introduced in previous studies (Pollitt et al., 2015; D'Agata et al., 2017; Sechi et al.,  
270 2013).

271 From these studies, an estimated 23 molecules of SA are available on each AuNP, which  
272 correlates to approximately 46 available biotin binding sites for biotinylated aptamers. While it is  
273 known that SA has 4 possible biotin binding sites, it was estimated that 2 would be incapable of  
274 binding with biotin. This assumption is based on the work conducted by D'Agata et al., which  
275 listed this effect is related to steric obstruction of binding sites caused by the most likely  
276 orientation of absorption for SA onto the surface of the NP (D'Agata et al., 2017). With our  
277 known initial concentration of AuNP, an estimate of 38 nM solution of biotinylated aptamers is  
278 needed for the total coverage. To prove this estimation, a similar procedure to the SA  
279 optimization was used to determine the optimum concentration of aptamers (Lim et al., 2012),  
280 and as seen in Fig 3C, 50 nM of biotinylated aptamers yielded to a stable shift in the spectra of  
281 536 nm. Although not an exact estimation we can see that the minimum possible values of  
282 aptamer needed is between 38 nM and 50 nM for complete and stable functionalization.

283 For the mechanism to properly detect their target allergen, GO concentration was also  
284 optimized by varying the concentration from 10 µg/mL to 90 µg/mL and getting the spectral scan  
285 from the supernatant after 45-minute wait and a pulse centrifugation at 6000 rpm for 10 seconds.  
286 This optimization was done in accordance with minimizing the amount of GO needed as it is also  
287 capable of interacting with SA, which could cause a similar reduction of fully functionalized  
288 nanoparticles (with aptamers) found in the supernatant if given enough time (Li et al., 2012).  
289 Therefore, to limit the loss of the colorimetric signal we optimized to use as little GO as needed.  
290 This was done because ssDNA such as aptamers, when unstructured, are much more sensitive

291 and capable of creating the necessary pi-pi interaction required in comparison to structured  
292 proteins like SA (Li et al., 2014, 2012). However, interaction is possible so the decision to  
293 minimize the amount of GO used for both decreasing the cost and increasing specificity of the  
294 output was prioritized. The minimum concentration that allows the mechanism to fully absorb  
295 unconjugated functionalized AuNP within the 45-min reaction time is 20 µg/mL of previously  
296 extensively sonicated GO (30 minute of prior sonication) (Fig. 3D).

### 297 *3.3. Biosensor validation, selectivity, and sensitivity*

298 To verify that the mechanism works as expected in solution, trials were first conducted to  
299 determine consistent response to given concentrations of allergens. For these tests, a spiked  
300 sample of protein allergen was introduced to the fully functionalized AuNP at different  
301 concentrations. Then GO was added at the previously optimized amount and 45 minutes of time  
302 was given to allow formation of the aggregates with the GO and AuNP. When the aptamer  
303 interacts with its specified protein, its structure changes from one which can interact with GO  
304 and create pi-pi stacking in to a rigid structure which weakly produces these bonds (Li et al.,  
305 2014). Through this mechanism of interaction, and the ability to prevent interaction we can  
306 selectively remove functionalized AuNP which have not conjugated with the specific allergenic  
307 protein from the solution with GO. This will create a colorimetric signal which is proportional to  
308 the amount of allergenic protein found in the food sample solution. This hypothesis was proven  
309 as shown in Fig. 4B where a standard curve for each aptamer is shown. The logarithmic model  
310 fit applied to peanut, milk and shrimp allergen response were .99474, .94134 and .98149  
311 respectively.

312 Using various concentrations of allergenic proteins, we can see a clear relationship between  
313 the allergen concentration and amount of AuNP left in solution. In testing, we measured allergen

314 concentrations down to 25 nM. The calculated lower limit of detection (LoD) for each allergen  
315 detection systems were calculated with a  $3\sigma$  ratio, calculated to be 7.8 nM, 12.4 nM and 6.3 nM  
316 for peanut, milk and shrimp systems respectively (Thomsen et al, 2003). As described by  
317 Thomsen et al. (2003), limits of detection were specifically calculated by first calculating the  
318 sensitivity (S) of system which was the change in concentration over the mean change of signal  
319 within the linear region. Then the standard deviation of the blank sample trials ( $S_{bl}$ ) was  
320 calculated and used in the equation  $C_L = k*(S_{bl})*(\Delta\text{Concentration} / \Delta\text{Intensity})$  (Thomsen et al.  
321 (2003)) with a  $3\sigma$  noise ratio (k). The FDA threshold level in food cross-contaminates are 0.25  
322 mg, 0.36 mg and 0.13 mg of peanut, milk and shrimp allergenic proteins respectively (Center for  
323 Food Safety and Applied Nutrition, 2016). The developed system can detect concentrations well  
324 under this required limit. This is a significant benefit as sensitive individuals may have different  
325 levels of sensitivities to these allergens. Although for the lower limit a spectrometer is required,  
326 for industrial application in the food industry, our developed tool provides a fast-quantitative  
327 alternative for current conventional methods like ELISA; which also require bench-top devices  
328 and significantly more reagent volumes and steps. Most ELISA kits offered by major suppliers  
329 like NEOGEN or r-Biopharms require bench top equipment like plate readers, a significant  
330 number of reagents and take 30 minutes or longer (NEOGEN, 2017a, 2017b, 2017c; r-Biopharm,  
331 2017a, 2017b, 2017c). These kits are considered the gold standard for industry; however, most  
332 are only able to detect within the microgram range in comparison to the mechanisms' ability to  
333 function at nanogram levels. Another significant benefit of this system is the simple processes  
334 required to obtain a measurement, in comparison to the multiple reagent ELISA tests that these  
335 systems utilize for detection of allergenic material, the proposed mechanism only requires  
336 operators to add GO after the sample has been incubated with the pre-functionalized AuNP. The

337 specific affinity for their target proteins is seen in Fig. 4C, where a selectivity study shows the  
338 output of the system which are spiked with 1000 nM of each protein. Although more  
339 comprehensive cross reactivity studies are necessary, there is limited cross reactivity between  
340 these aptamers. This makes them ideal for their application as an onsite biosensor as they are  
341 both highly sensitive and selective, with results that directly correspond to the amount of allergen  
342 present.

### 343 *3.4. Microfluidics paper-based analytical device*

344 Paper based microfluidics offer a variety of benefits which can be utilized to make the  
345 proposed mechanism much more available outside the laboratory environment. The main goal of  
346 the proposed bio-sensing system is to increase the options for a sensitive individual or food  
347 manufacturer to quickly and efficiently detect these proteins. To accomplish this, we utilized  
348 simple cellulose based paper to both help separate the created complexes from solution and  
349 increase the readability of the result. Using paper to filter the sample matrix is one of its oldest  
350 known usage in science (Yetisen et al., 2013), and here we can use it for this specific purpose.  
351 We selected Whatman 1 cellulose based paper as it does not degrade over time, its availability  
352 and low cost (GE Healthcare Life Sciences, 2017; Mahato et al., 2017). To first verify if it is  
353 possible to filter the developed complexes with Whatman paper (pore diameter of 11 $\mu$ m) test  
354 samples were first incubated with varying quantities of allergenic protein and then allowed to  
355 interact with GO and filtered through the paper. The supernatant derived from this test can be  
356 seen in Fig. 5A, and shows the ability of the paper to remove the developed complexes from  
357 solution, while allowing passage way for the un-absorbed AuNP. As we know that Whatman 1  
358 filter paper can selectively remove the complex from solution we designed a paper device which  
359 utilizes a simple 3-fold design, as seen in Fig. 5B, to filter and present the output of the results.



360 We added hydrophobic barriers to this paper using a Xerox Colorcube, which allows to direct  
361 and control the flow in the paper device (Lee and Gomez, 2017; Lisowski and Zarzycki, 2013).  
362 In this case, we can push the liquid through the filter layer and to limit the loss of the sample  
363 through adsorption into each layer.

364 For our design, we were able to utilize less than 30  $\mu\text{L}$  of the GO reacted systems to view a  
365 measurable result. A scaled-up model with a greater number of testing zones was used to  
366 simultaneously test many allergen concentrations and peanut aptamer functionalized AuNP. We  
367 used various peanut allergen concentration samples and incubated 20  $\mu\text{L}$  of the functionalized  
368 AuNP and then added GO. After 30 minutes the 20  $\mu\text{L}$  of solution, which contained both the  
369 floating complexes and unbound AuNP that have developed, were dispersed on a layer of paper  
370 with designated zone made by printed hydrophobic wax. This layer is where the sample is first  
371 dispersed and acts as the filtering layer for the complexes, identical to the function of the middle  
372 layer in Fig. 5B. This layer was then placed on top of another layer, of identical design, with  
373 hydrophobic barrier defined zones. The backside of this bottom layer was covered with tape to  
374 prevent any further fluid transfer. As shown in Fig. 5B, this bottom layer is designed to function  
375 as the output readout or the color presentation layer. The last top cover layer, which was simply a  
376 sheet of para film wax was placed on the top. This acts similarly to the top layer in Fig. 5B and is  
377 used to help push the sample through the filter layer onto the color output readout layer. A large  
378 sheet of glass placed on the top to help to provide even pressure to all testing areas as we pushed  
379 by hand. After 1 minute, the layers were disassembled and the output layer, as seen in Fig. 5C,  
380 shows the resultant dyeing by the free AuNP. Visibly, this has made direct observation much  
381 simpler and can help the user quickly identify the possible level of contamination. We can  
382 further quantify the results using very simple processing procedures, as conducted by (Jokerst et

383 [al., 2012](#)). Requiring only an image of the testing zone to measure average mean grey intensity.  
384 Using ImageJ software (NIH, USA), we collected information on the mean grey average of each  
385 zone after testing. Fig. 5D is the collection of this data, showing us a similar output to that of the  
386 in-solution verification (Fig. 4B). From this we can also quantify lower levels of allergen  
387 concentration with significant reliability, though the requirement of a camera is necessary.  
388 Although this is the case, the availability and accessibility of smart devices with a camera in  
389 comparison to a bench top spectra device is easily seen. The simple processing steps to acquire  
390 the mean grey average from the output zone in an image is far simpler and more accessible.  
391 Using the method described by Thomsen et al., [\(2003\)](#) we calculated the lowest possible  
392 detectable concentration with a  $3\sigma$  signal to noise ratio for the paper device, being found to be 27  
393 nM. Although we can detect down to 25 nM using the spectra, the paper devices showed  
394 reproducible identification for values at or above 50 nM with the peanut aptamer functionalized  
395 AuNP. Below this amount it became difficult to see or measure any color dying caused by AuNP  
396 which were not absorbed into a complex with GO in the paper based device.

#### 397 **4. Conclusions**

398 For individuals living with allergen sensitivity, there is a significant lack of pro-active  
399 measures to help protect their health and well-being. There is a necessity for a bio-sensor system  
400 that can directly benefit both government and manufacturers, that is accurate, specific, low-cost  
401 and requires limited usage of laboratory instrumentation to detect allergen contamination in food.  
402 By utilizing the power of golds strong optical properties, with the selectivity and sensitivity of  
403 aptamer and the power of paper-based microfluidics the proposed device can meet these needs.  
404 With the proposed mechanism, we could accurately measure allergens from 25 nM – 1000 nM  
405 with LoD of 7.8 nM, 12.4 nM and 6.2 nM for peanut, milk and shrimp allergens respectively in

406 solution. A 50 nM – 1000 nM range with a LoD of 27 nM was achieved when integrated with the  
407 microfluidic paper device when utilized with a smart device with a camera. Furthermore, the  
408 system only requires the need for two reagents, functionalized AuNP and GO, and a simple and  
409 cheap paper based device. Further optimization and investigation is however required to both  
410 fully understand the capabilities of the mechanism and to create a better experience for the end  
411 user. Overall, the proposed device is highly comparable in time to other quantitative methods,  
412 such as ELISA, with even greater sensitivity and less complexity. This combination allows it to  
413 be a potential tool for those living with allergen sensitivities and giving food manufacturer's an  
414 in-expensive and efficient method to control cross-contamination and mitigate associated  
415 economic losses.

416

## 417 **Acknowledgments**

418 The authors sincerely thank the Natural Sciences and Engineering Research Council of  
419 Canada (#400705) for funding this study.

420

## 421 **References**

422

423 AAFA, 2017. Allergy Facts and Figures. <http://www.aafa.org/page/allergy-facts.aspx> (accessed  
424 7.12.17).

425 Alves, R.C., Barroso, M.F., González-García, M.B., Oliveira, M.B.P.P., Delerue-Matos, C., 2016.  
426 Crit. Rev. Food Sci. Nutr. 56, 2304–2319.

427 BasePair Biotechnologies, 2017. Aptamers vs. Antibodies.  
428 <http://linkinghub.elsevier.com/retrieve/pii/S2162253116303213> (accessed 8.22.17).

429 Bayer, E.A., Ben-Hur, H., Wilchek, M., 1990. *Methods Enzymol.* 184, 80–89.

430 CDC. Allergies: Gateway to Health Communication. CDC.  
431 <https://www.cdc.gov/healthcommunication/ToolsTemplates/EntertainmentEd/Tips/Allergies.htm>  
432 1 (accessed 8.15.17).

433 Center for Food Safety and Applied Nutrition, 2017. Consumers - Food Allergies: What You  
434 Need to Know. FDA. <https://www.fda.gov/food/resourcesforyou/consumers/ucm079311.htm>  
435 (accessed 8.13.17).

436 Center for Food Safety and Applied Nutrition, O. of R.A., 2016. Allergens - Approaches to  
437 Establish Thresholds for Major Food Allergens and for Gluten in Food. Appendices. Center for  
438 Food Safety and Applied Nutrition, Office of Regulatory Affairs, Silver Spring.

439 Costa, M.N., Veigas, B., Jacob, J.M., Santos, D.S., Gomes, J., Baptista, P. V, Martins, R., Inácio,  
440 J., Fortunato, E., 2014. *Nanotechnology* 25, 94006.

441 D’Agata, R., Palladino, P., Spoto, G., 2017. *Beilstein J. Nanotechnol.* 8, 1–11.

442 FARE, 2016. Allergic reactions to food -- a range of symptoms | Allercom Allergy Consulting,  
443 Inc. <http://allercom.com/allergic-reactions-to-food-a-range-of-symptoms/> (accessed 8.16.17).

444 GE Healthcare Life Sciences, 2017. Whatman Filters & Sample Collection. [gelifesciences.com](http://www.gelifesciences.com).  
445 [http://www.gelifesciences.com/webapp/wcs/stores/servlet/CategoryDisplay?categoryId=3333983](http://www.gelifesciences.com/webapp/wcs/stores/servlet/CategoryDisplay?categoryId=3333983&catalogId=132131&productId=&top=Y&storeId=11756&langId=-1)  
446 [&catalogId=132131&productId=&top=Y&storeId=11756&langId=-1](http://www.gelifesciences.com/webapp/wcs/stores/servlet/CategoryDisplay?categoryId=3333983&catalogId=132131&productId=&top=Y&storeId=11756&langId=-1) (accessed 9.4.17).

- 447 Geneviève, M., Vieu, C., Carles, R., Zwick, A., Brière, G., Salomé, L., Trévisiol, E., 2007.  
448 *Microelectron. Eng.* 84(5), 1710-1713.
- 449 Haiss, W., Thanh N.T., Aveyard, J., Fernig, D.G., 2007. *Anal. Chem.* 79, 4215–4221.
- 450 ImageJ, n.d. Analyze Menu. <https://imagej.nih.gov/ij/docs/menus/analyze.html> (accessed 9.4.17).
- 451 Kimling, J., Maier, M., Okenve, B., Kotaidis, V., Ballot, H., Plech, A., 2006. *J. Phys. Chem. B*,  
452 110(32), 15700-15707.
- 453 Jokerst, J.C., Adkins, J.A., Bisha, B., Mentele, M.M., Goodridge, L.D., Henry, C.S., 2012. *Anal.*  
454 *Chem.* 84, 2900–2907.
- 455 Kallós, P., Waksman, B., de Weck, A., 1978. *Chem. Immunol. Allergy* 25, 1–62.
- 456 Keefe, A.D., Pai, S., Ellington, A., 2010. *Nat. Rev. Drug Discov.* 9, 537–550.
- 457 Lakhin, A. V, Tarantul, V.Z., Gening, L. V, 2013. *Acta Naturae* 5, 34–43.
- 458 Lee, W., Gomez, F., 2017. *Micromachines* 8, 99.
- 459 Li, C., Yang, Y., Zhang, B., Chen, G., Wang, Z., Li, G., 2014. *Part. Part. Syst. Charact.* 31, 201–  
460 208.
- 461 Li, S., Aphale, A.N., Macwan, I.G., Patra, P.K., Gonzalez, W.G., Miksovska, J., Leblanc, R.M.,  
462 2012. *ACS Appl. Mater. Interfaces* 4, 7069–7075.
- 463 Lim, S., Koo, O.K., You, Y.S., Lee, Y.E., Kim, M.-S., Chang, P.-S., Kang, D.H., Yu, J.-H., Choi,  
464 Y.J., Gunasekaran, S., 2012. *Sci. Rep.* 2, 456.
- 465 Lisowski, P., Zarzycki, P.K., 2013. *Chromatographia* 76, 1201–1214.
- 466 Low, A., Bansal, V., 2010. *Biomed. Imaging Interv. J.* 6, 1-9.

- 467 Lu, Z., Chen, X., Wang, Y., Zheng, X., Li, C.M., 2015. *Microchim. Acta* 182, 571–578.
- 468 Mahato, K., Srivastava, A., Chandra, P., 2017. *Biosens. Bioelectron.* 96, 246–259.
- 469 Martinez, A.W., Phillips, S.T., Butte, M.J., Whitesides, G.M., 2007. *Angew. Chemie Int. Ed.* 46,  
470 1318–1320.
- 471 Martinez, A.W., Phillips, S.T., Whitesides, G.M., Carrilho, E., 2010. *Anal. Chem.* 82, 3-10.
- 472 Mie, G., 1908. *Ann. Phys.* 330, 377–445.
- 473 Natale, M., Bisson, C., Monti, G., Peltran, A., Perono Garoffo, L., Valentini, S., Fabris, C.,  
474 Bertino, E., Coscia, A., Conti, A., 2004. *Mol. Nutr. Food Res.* 48, 363–369.
- 475 NEOGEN, 2017a. BioKits Peanut Assay Kit. NEOGEN.  
476 <http://foodsafety.neogen.com/en/biokits-peanut-assay-kit> (accessed 9.4.17).
- 477 NEOGEN, 2017b. BioKits BLG Assay Kit. NEOGEN. [http://foodsafety.neogen.com/en/biokits-](http://foodsafety.neogen.com/en/biokits-blg-assay-kit)  
478 [blg-assay-kit](http://foodsafety.neogen.com/en/biokits-blg-assay-kit) (accessed 9.4.17).
- 479 NEOGEN, 2017c. Veratox® for Crustacea. NEOGEN. [http://foodsafety.neogen.com/en/veratox-](http://foodsafety.neogen.com/en/veratox-crustacea#documents)  
480 [crustacea#documents](http://foodsafety.neogen.com/en/veratox-crustacea#documents) (accessed 9.4.17).
- 481 Park, J.S., Goo, N.-I., Kim, D.E., 2014. *Langmuir* 30, 12587–12595.
- 482 Pascal, M., Grishina, G., Yang, A.C., Sánchez-García, S., Lin, J., Towle, D., Ibañez, M.D.,  
483 Sastre, J., Sampson, H.A., Ayuso, R., 2015. *J. Allergy Clin. Immunol. Pract.* 3, 521–529.
- 484 Pollitt, M.J., Buckton, G., Piper, R., Brocchini, S., Athwal, D., Walters, C., Burton, D.R.,  
485 Harding, S.E., Engelborghs, Y., Borghs, G., 2015. *RSC Adv.* 5, 24521–24527.

- 486 r-Biopharm, 2017a. RIDASCREEN®FAST Peanut - R-Biopharm AG. [http://www.r-](http://www.r-biopharm.com/products/food-feed-analysis/allergens/nuts/item/ridascreenfast-peanut)  
487 [biopharm.com/products/food-feed-analysis/allergens/nuts/item/ridascreenfast-peanut](http://www.r-biopharm.com/products/food-feed-analysis/allergens/nuts/item/ridascreenfast-peanut) (accessed  
488 9.4.17a).
- 489 r-Biopharm, 2017b. RIDASCREEN®  $\beta$ -Lactoglobulin - R-Biopharm AG. [http://www.r-](http://www.r-biopharm.com/products/food-feed-analysis/allergens/milk/item/ridascreen-beta-lactoglobulin)  
490 [biopharm.com/products/food-feed-analysis/allergens/milk/item/ridascreen-beta-lactoglobulin](http://www.r-biopharm.com/products/food-feed-analysis/allergens/milk/item/ridascreen-beta-lactoglobulin)  
491 (accessed 9.4.17b).
- 492 r-Biopharm, 2017c. RIDASCREEN®FAST Crustacean - R-Biopharm AG. [http://www.r-](http://www.r-biopharm.com/products/food-feed-analysis/allergens/crustaceans/item/ridascreenfast-crustacean)  
493 [biopharm.com/products/food-feed-analysis/allergens/crustaceans/item/ridascreenfast-crustacean](http://www.r-biopharm.com/products/food-feed-analysis/allergens/crustaceans/item/ridascreenfast-crustacean)  
494 (accessed 9.4.17c).
- 495 Schneider, C.A., Rasband, W.S., Eliceiri, K.W., 2012. *Nat Meth* 9, 671–675.
- 496 Sechi, D., Greer, B., Johnson, J., Hashemi, N., 2013. *Anal. Chem.* 85, 10733–10737.
- 497 Smith, W., 2013. *Aust. Fam. Physician* 42, 12–16.
- 498 Thomsen, V., Schatzlein, D., Mercurio, D., 2003. *Spectroscopy* 18, 112–114.
- 499 Turkevich, J., Stevenson, P.C., Hillier, J., 1951. *Discuss. Faraday Soc.* 11, 55.
- 500 Wang, Y., Li, Z., Wang, J., Li, J., Lin, Y., 2011. *Trends Biotechnol.* 29, 205–212.
- 501 Weng, X., Neethirajan, S., 2016. *Biosens. Bioelectron.* 85, 649–656.
- 502 World Allergy Organization, 2011. *WAO White Book on Allergy*. Milwaukee.
- 503 Wu, M., Kempaiah, R., Huang, P.-J.J., Maheshwari, V., Liu, J., 2011. *Langmuir* 27, 2731–2738.
- 504 Xu, Y., Enomae, T., Fan, X.Q., Jiang, X.P., Liu, S., Garnier, G., Shen, W., 2014. *RSC Adv.* 4,  
505 12867–12872.

506 Yetisen, A.K., Akram, M.S., Lowe, C.R., 2013. Lab Chip 13, 2210. x

507 Zhou, J., Rossi, J., 2016. Nat. Rev. Drug Discov. 16, 181–202.

508 Zhuang, Y., Dreskin, S.C., 2013. Immunol. Res. 55, 125–134.

509

510



511

**Table 1.** Aptamer Sequence for detection of each specific allergen

| <i>Allergen</i>        | <b>Sequence</b>                                                                                                                        | <b>Bases<br/>(nt)</b> | <b>Tm<br/>(°C)</b> | <b>GC<br/>%</b> |
|------------------------|----------------------------------------------------------------------------------------------------------------------------------------|-----------------------|--------------------|-----------------|
| <i>β-lactoglobulin</i> | ATA CCA GCT TAT TCA ATT CGA CGA<br>TCG GAC CGC AGT ACC CAC CCA CCA<br>GCC CCA ACA TCA TGC CCA TCC GTG<br>TGT GAG ATA GTA AGT GCA ATC T | 94                    | 72.9               | 51.1            |
| <i>Arachin</i>         | TCG CAC ATT CCG CTT CTA CCG GGG<br>GGG TCG AGC GAG TGA GCG AAT CTG<br>TGG GTG GGC CGT AAG TCC GTG TGT<br>GCG AA                        | 77                    | 75.8               | 62.3            |
| <i>Tropomyosin</i>     | TAC TAA CGG TAC AAG CTA CCA GGC<br>CGC CAA CGT TGA CCT AGA AGC ACT<br>GCC AGA CCC GAA CGT TGA CCT AGA<br>AGC                           | 75                    | 72.8               | 54.7            |

512

513

514

515

516

517

518

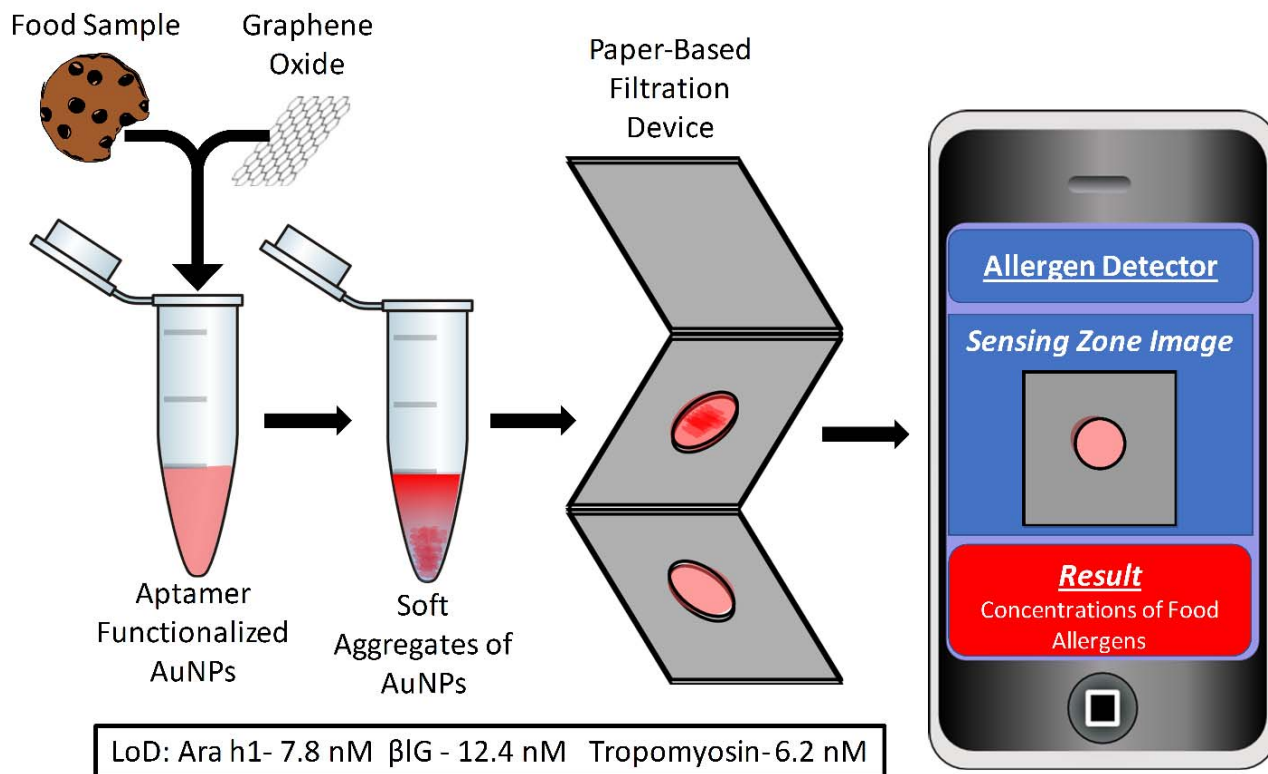

519

520

### Graphical Abstract

521

522

523

524

525

526

527

528

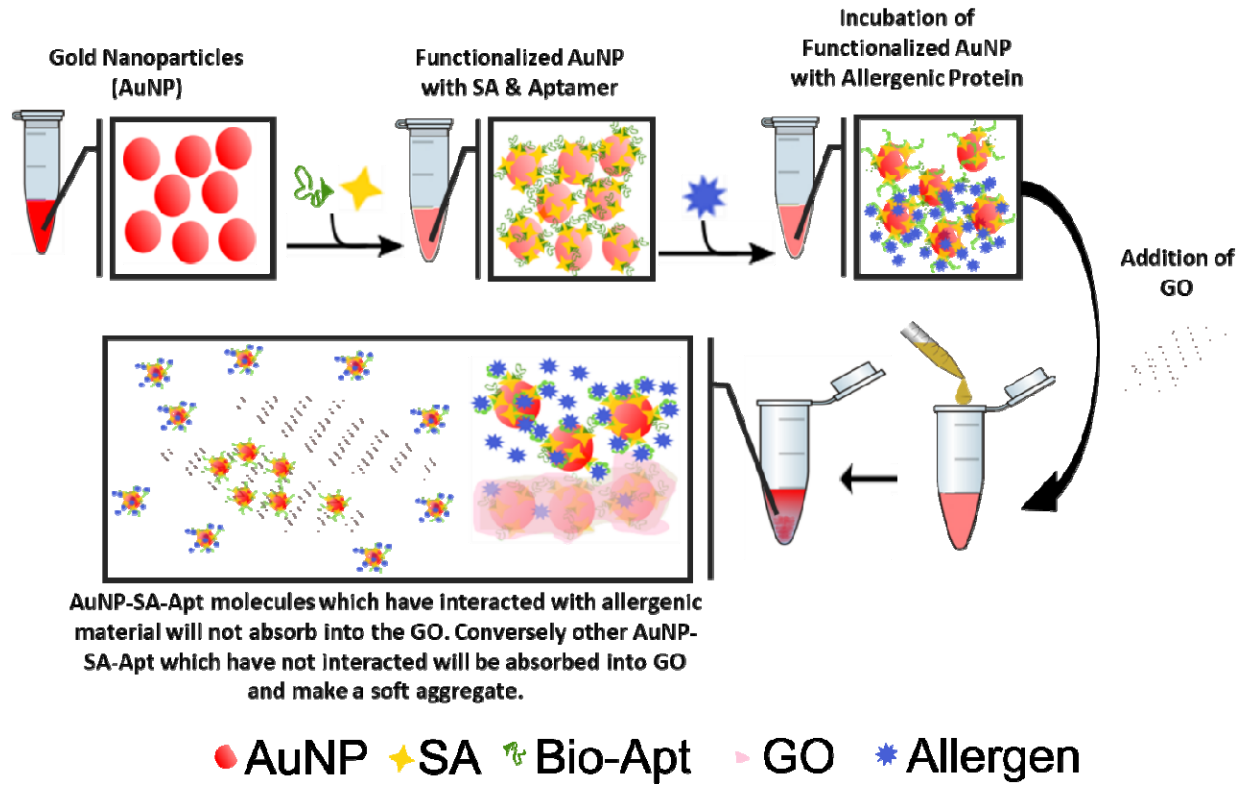

529

530 **Fig. 1.** Schematic of the proposed mechanism for colorimetric detection of allergens with the use

531 of AuNP, Aptamers and GO. When in the presence of allergenic proteins the AuNP-SA-Apt

532 molecules are prevented from interfacing with the GO when added, if some AuNP-SA-Apt

533 molecules have not

534

535

536

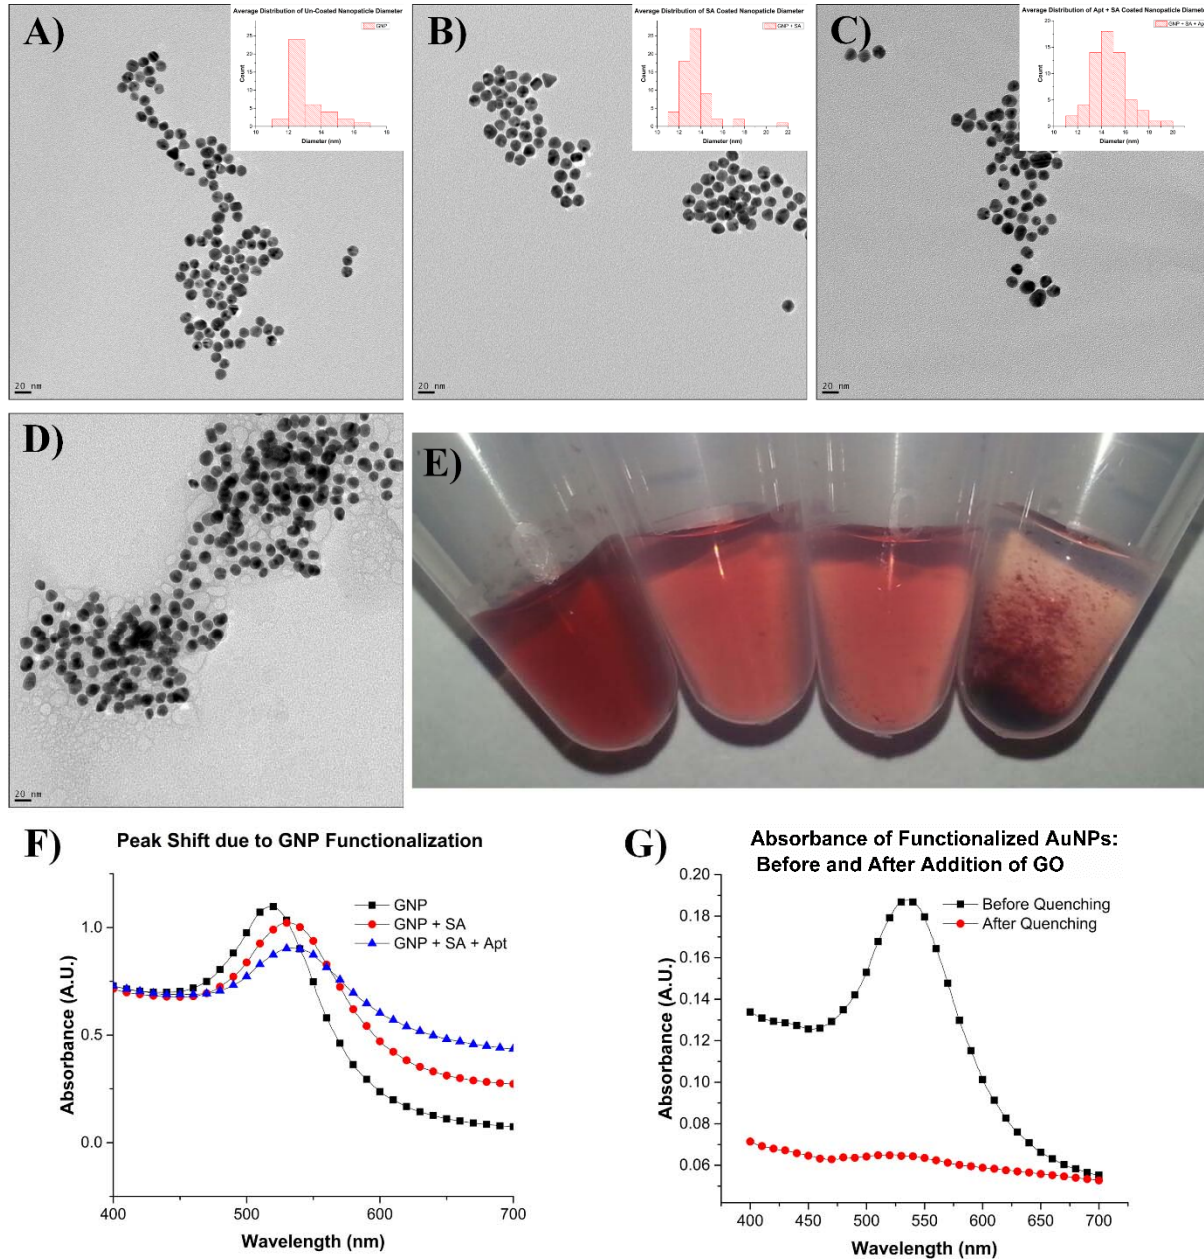

537

538 **Fig. 2.** TEM micrographs of A) AuNP, B) AuNP-SA, C) AuNP-SA-Milk Apt, and D) AuNP-  
539 SA-Milk Apt +GO nanosheets with histogram of average diameter found to right. E) Image of  
540 AuNP, AuNP-SA-ssDNA, AuNP-SA-ssDNA + GO + 1000 nM allergen spiked sample in  
541 solution and AuNP-SA-ssDNA + GO with no allergen spike F) Spectral shift caused by the

542 conjugation of SA and aptamer compared to bare nanoparticles. G) Spectra of functionalized  
543 AuNP before and after the addition of GO.

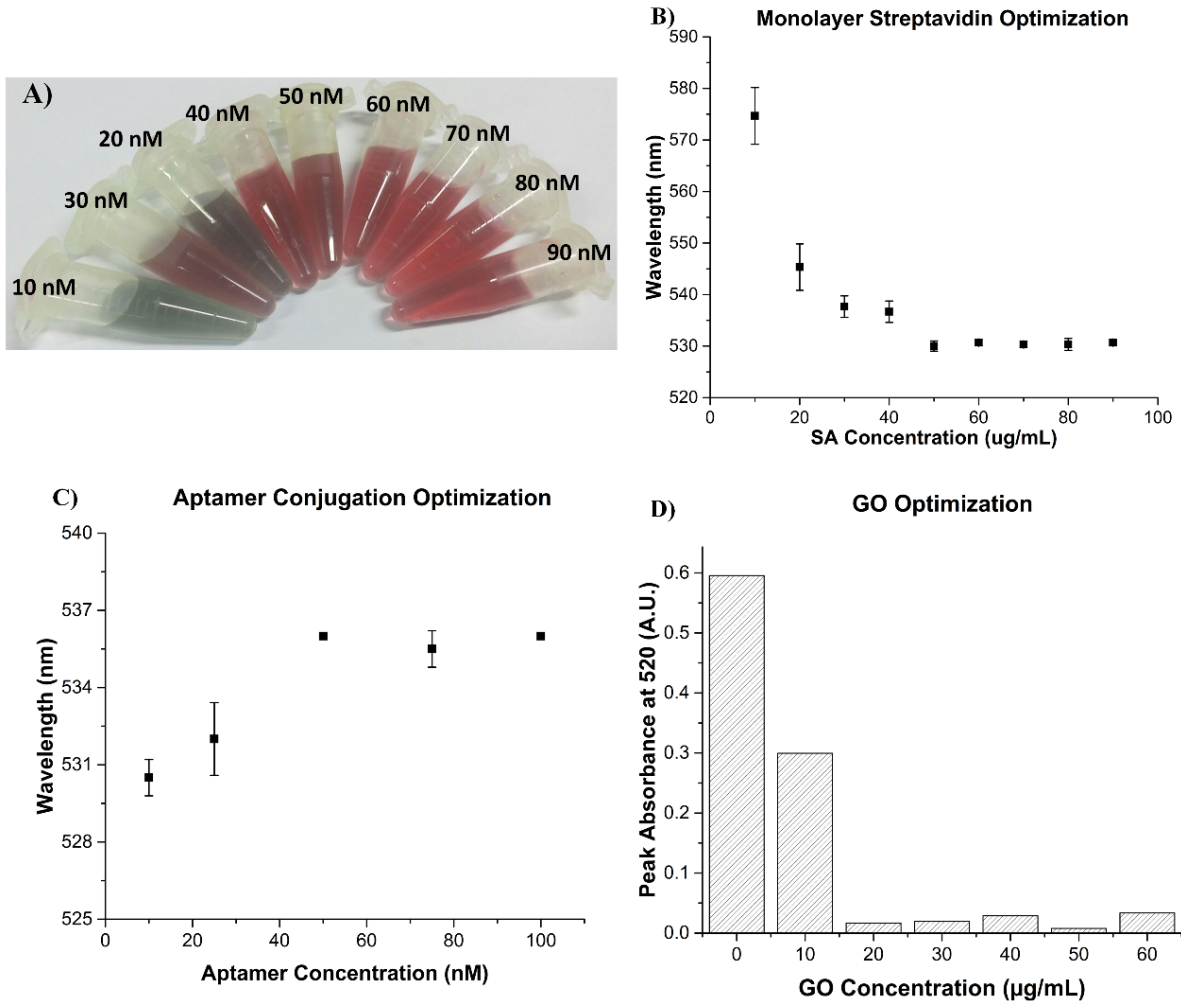

544  
545 **Fig. 3** A) SA conjugation from 10  $\mu\text{g/mL}$  to 90  $\mu\text{g/mL}$  after NaCl addition. B) Spectra shift after  
546 SA conjugation. C) Spectral shift after aptamer conjugation using different concentrations. D)  
547 GO optimization conjugation using the peak absorbance at 520 nm with 45-minute wait after  
548 introduction of GO.

549

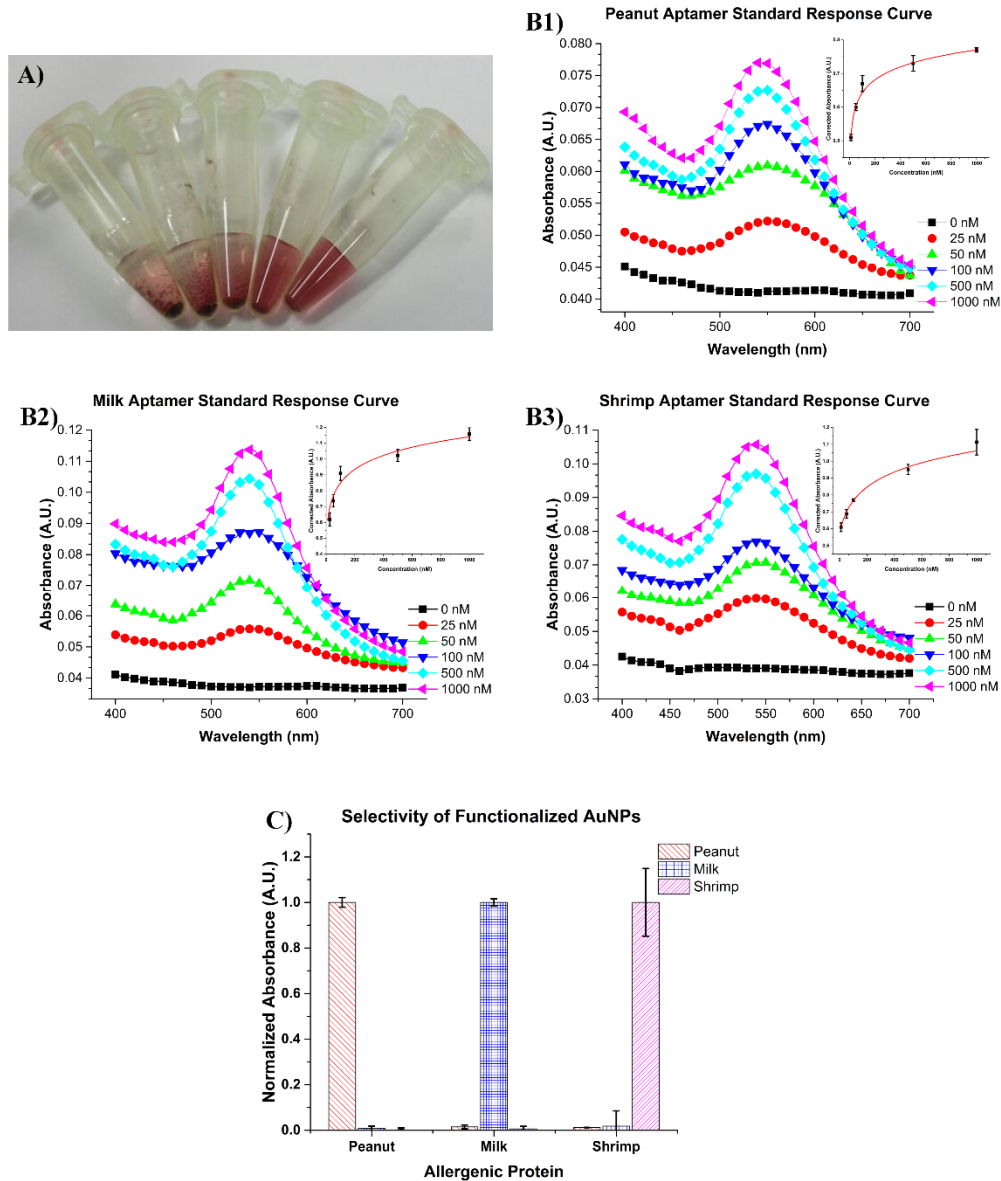

550

551 **Fig. 4** A) Functionalized AuNP reacted with (from left to right) 25 nM, 50 nM, 100 nM, 500 nM  
552 and 1000 nM of allergenic protein and pulse centrifuged. B1, 2&3) Spectral signal from the  
553 supernatant due to the reaction and GO absorption of the unstructured aptamer on AuNP from  
554 various allergen concentrations of B1) Peanut, B2) Milk and B3) Shrimp, bottom to top 25 nM,  
555 50 nM, 100 nM, 500 nM and 1000 nM. C) Selectivity study of the functionalized AuNP system  
556 to the other allergenic proteins.

557

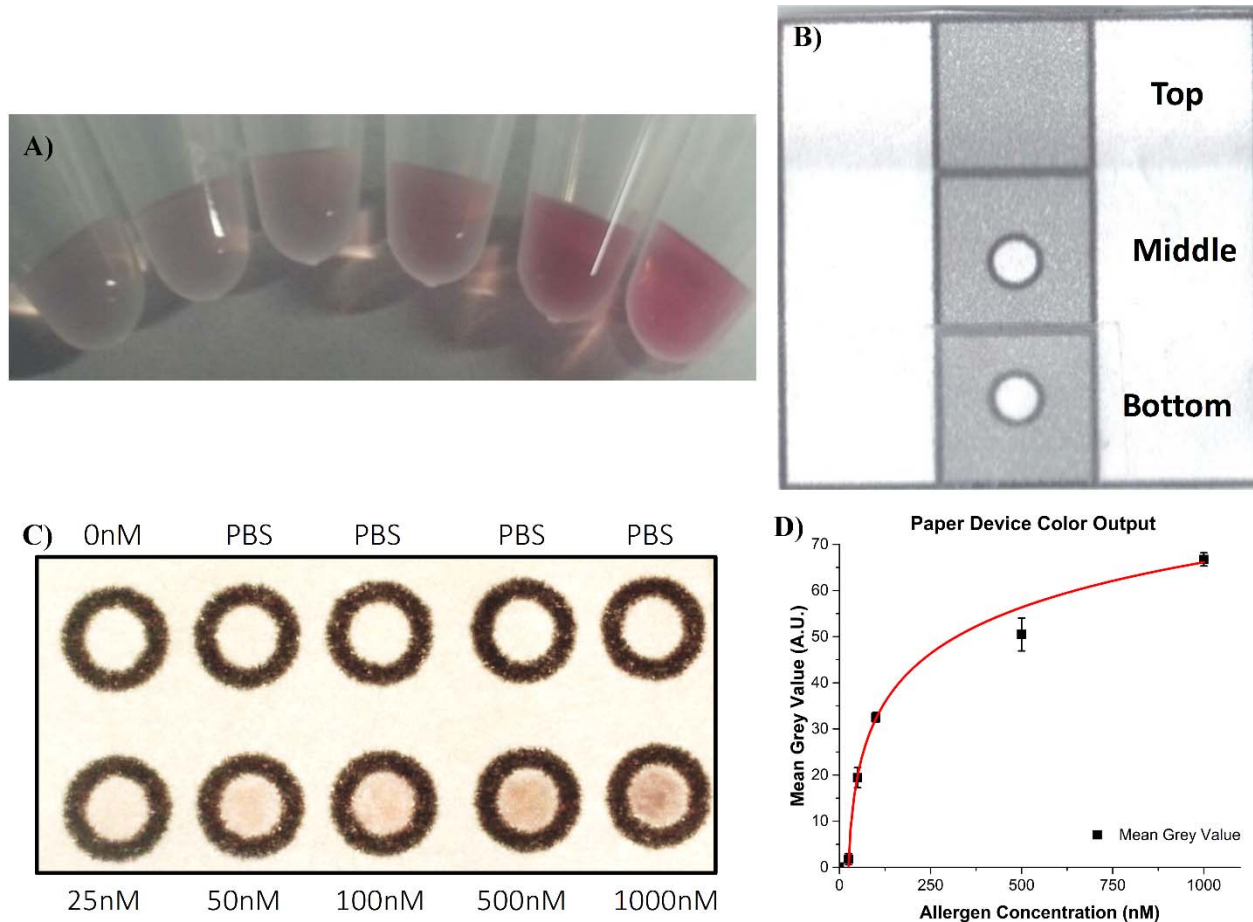

558

559 **Fig. 5** A) Image of the supernatant produced after simple filtration with Whatman 1 filter paper  
560 of samples with varying quantities of allergenic protein and the addition of GO, from left to  
561 right: 0 nM, 25 nM, 50 nM, 100 nM, 500 nM and 1000 nM of allergenic protein. B) Image of  
562 simple 3-fold paper based device for assistance in detection of allergens in food. The Top: Lid  
563 Layer, Middle: Filter Layer, Bottom: Output Layer. C) Image of the output layer after filtering  
564 samples with varying amounts of allergenic proteins, from left to right: 0 nM, 25 nM, 50 nM,  
565 100 nM, 500 nM and 1000 nM of allergenic protein. D) Graph of the measured mean grey value  
566 of ROI from image C.

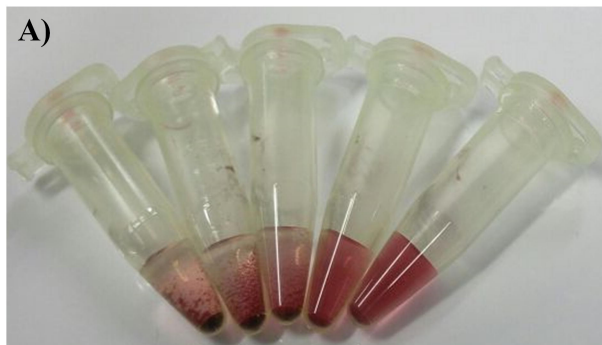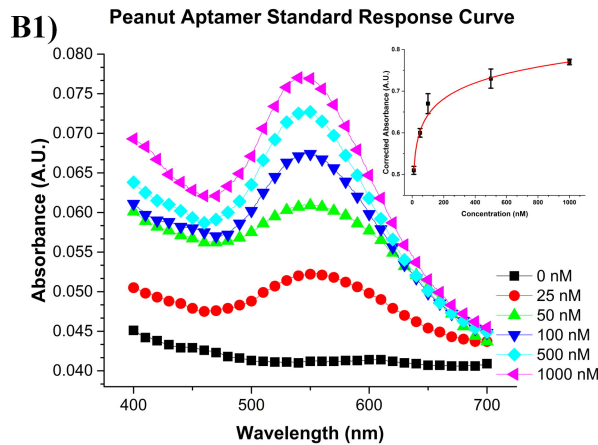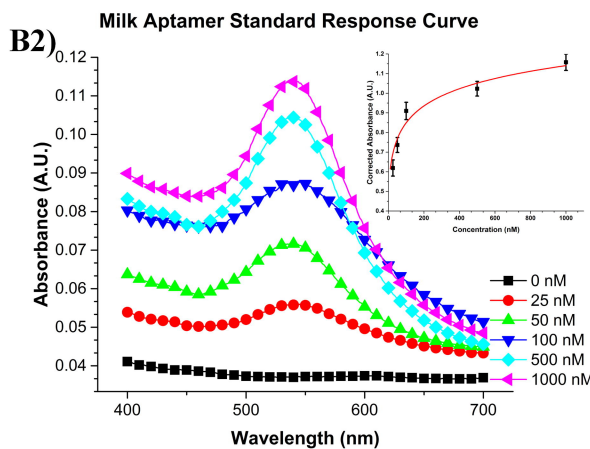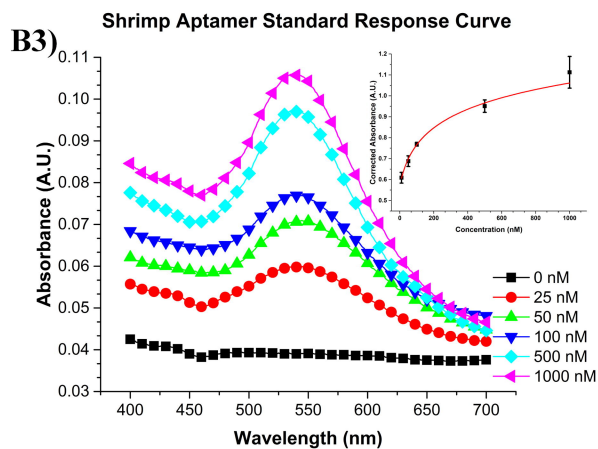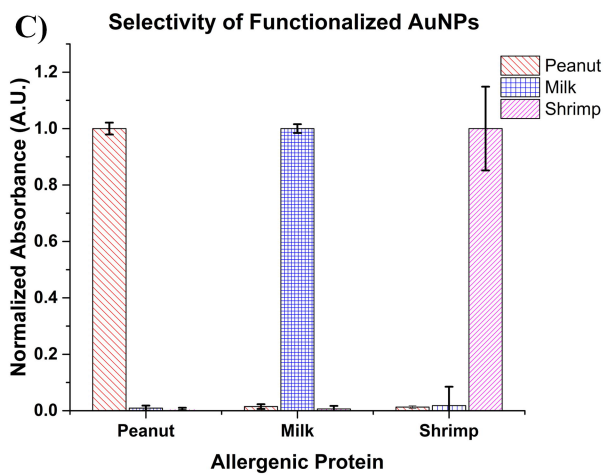



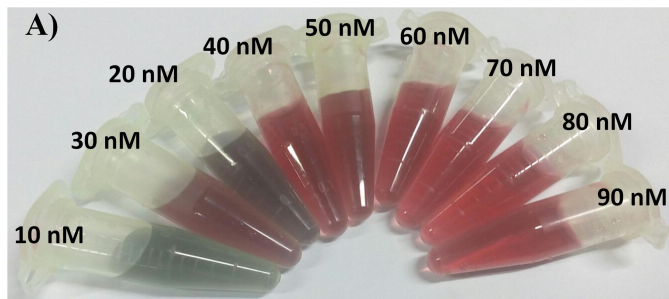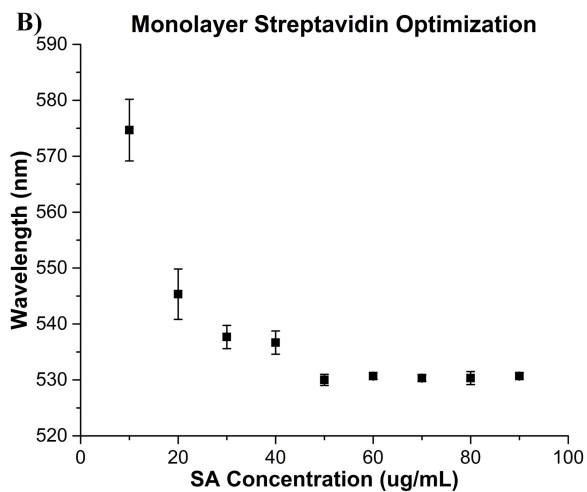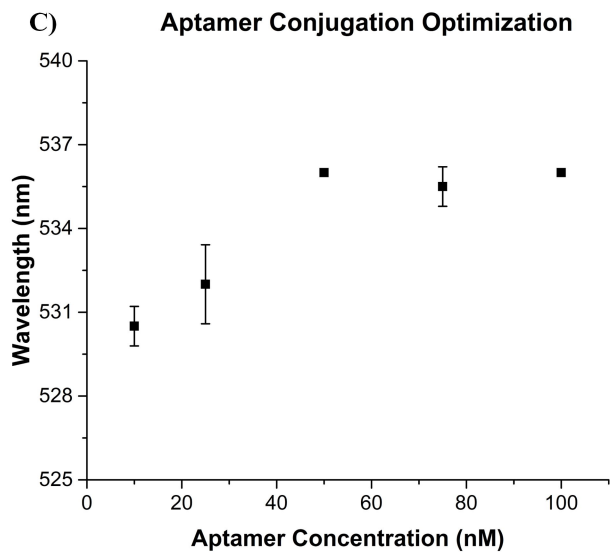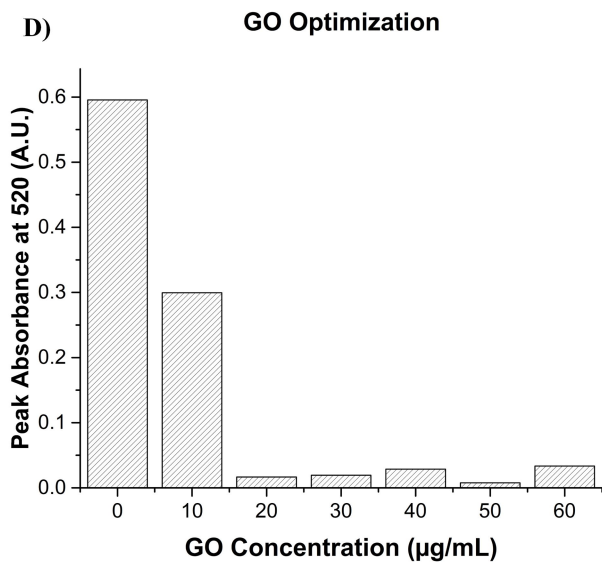

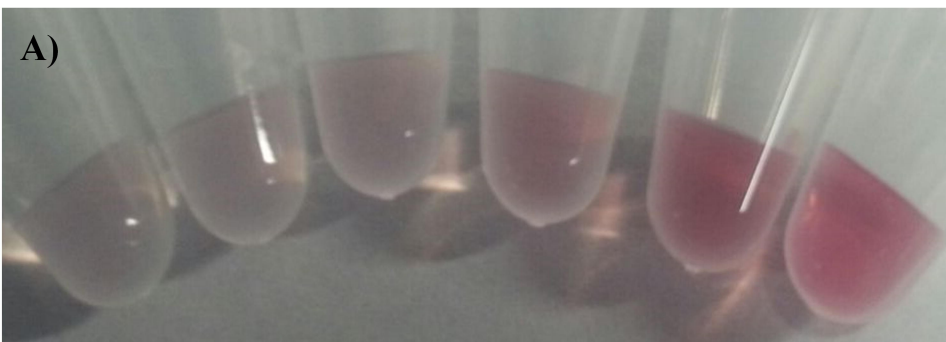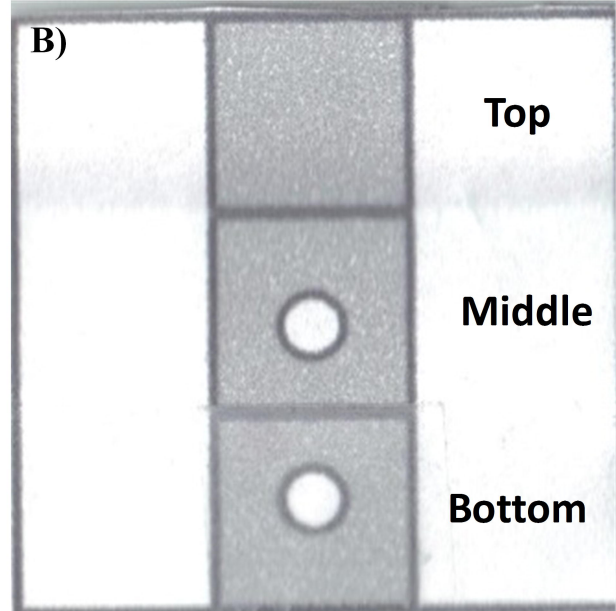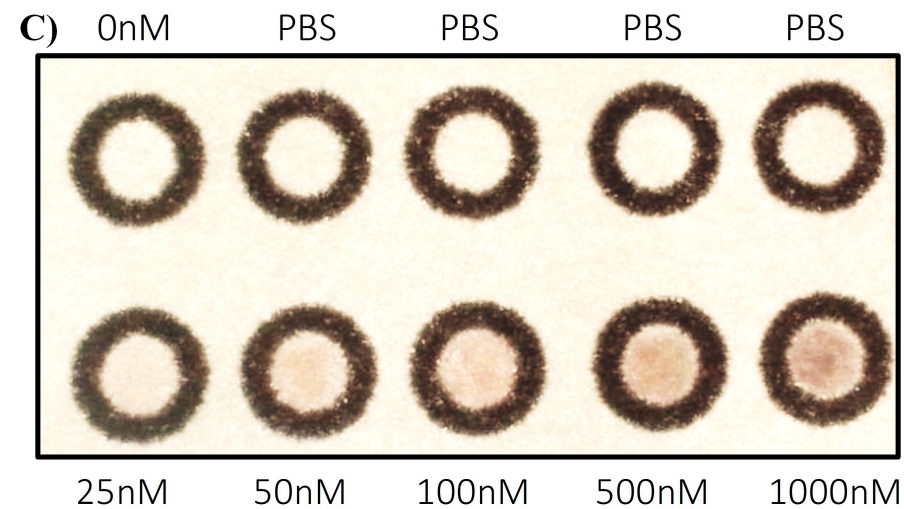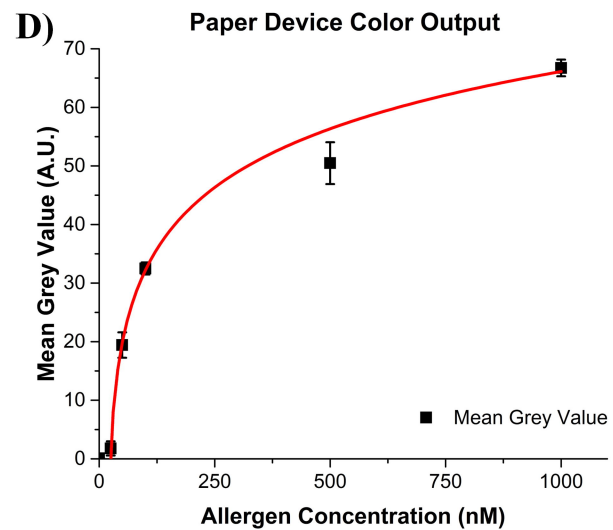

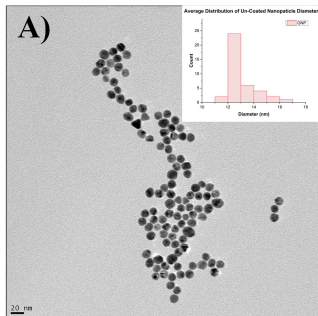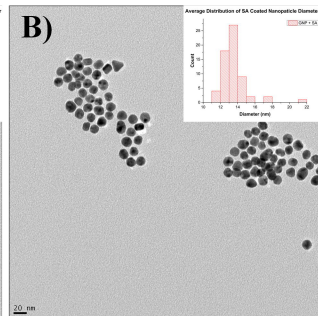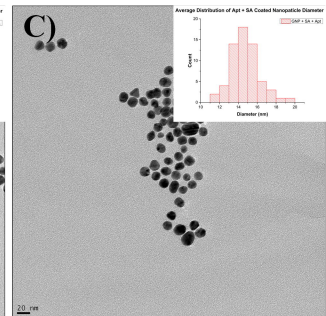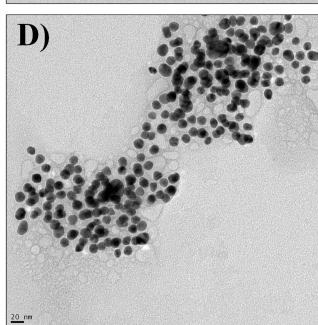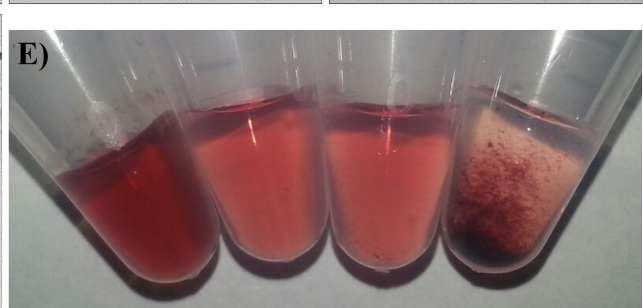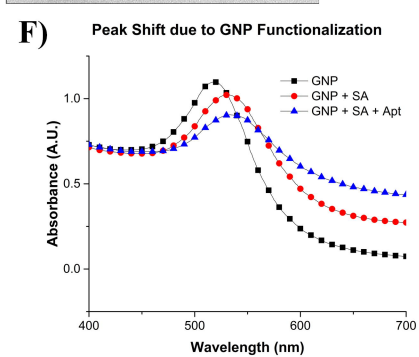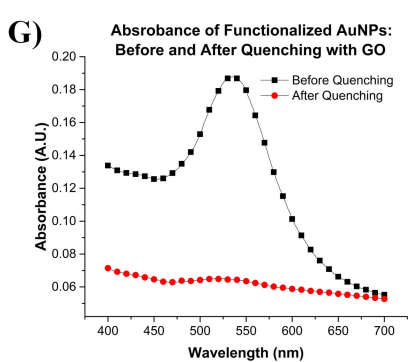

Food Sample

Graphene  
Oxide

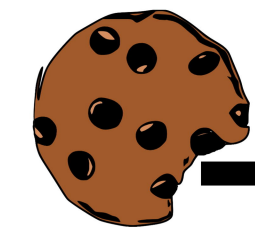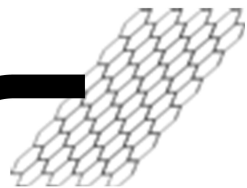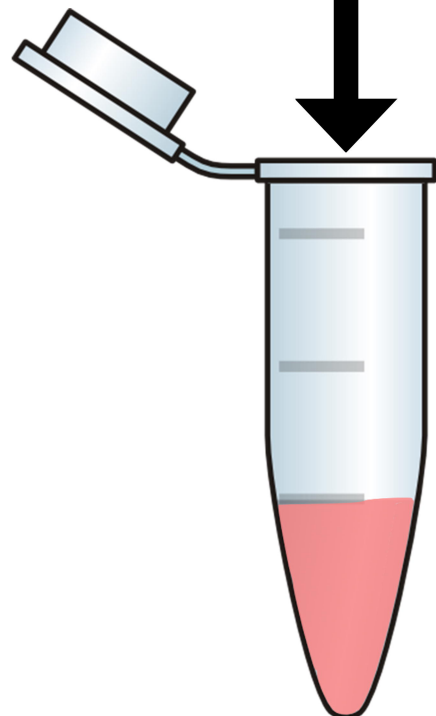

Aptamer  
Functionalized  
AuNPs

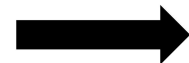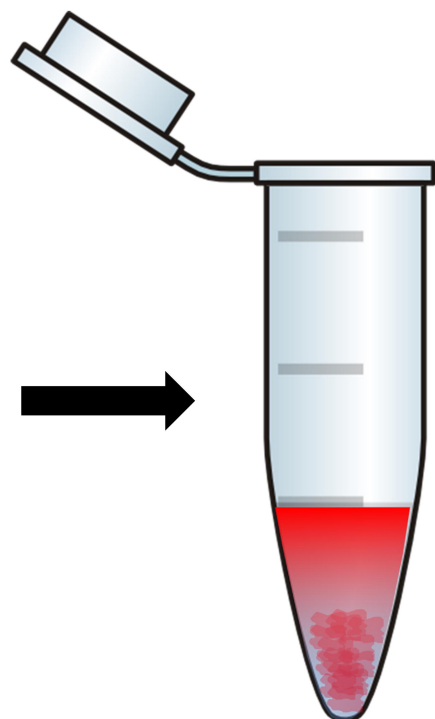

Soft  
Aggregates of  
AuNPs

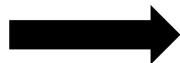

Paper-Based  
Filtration  
Device

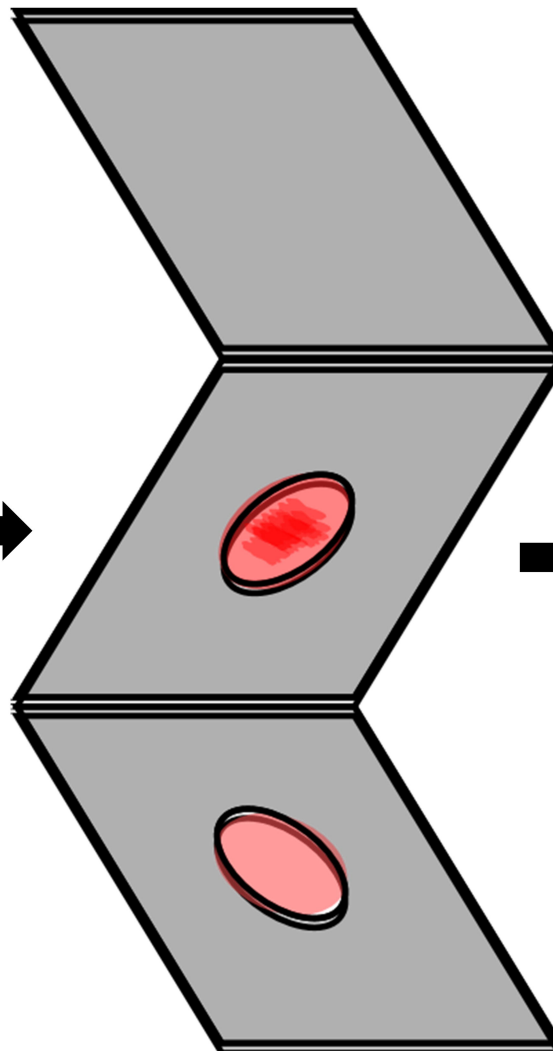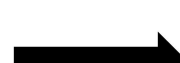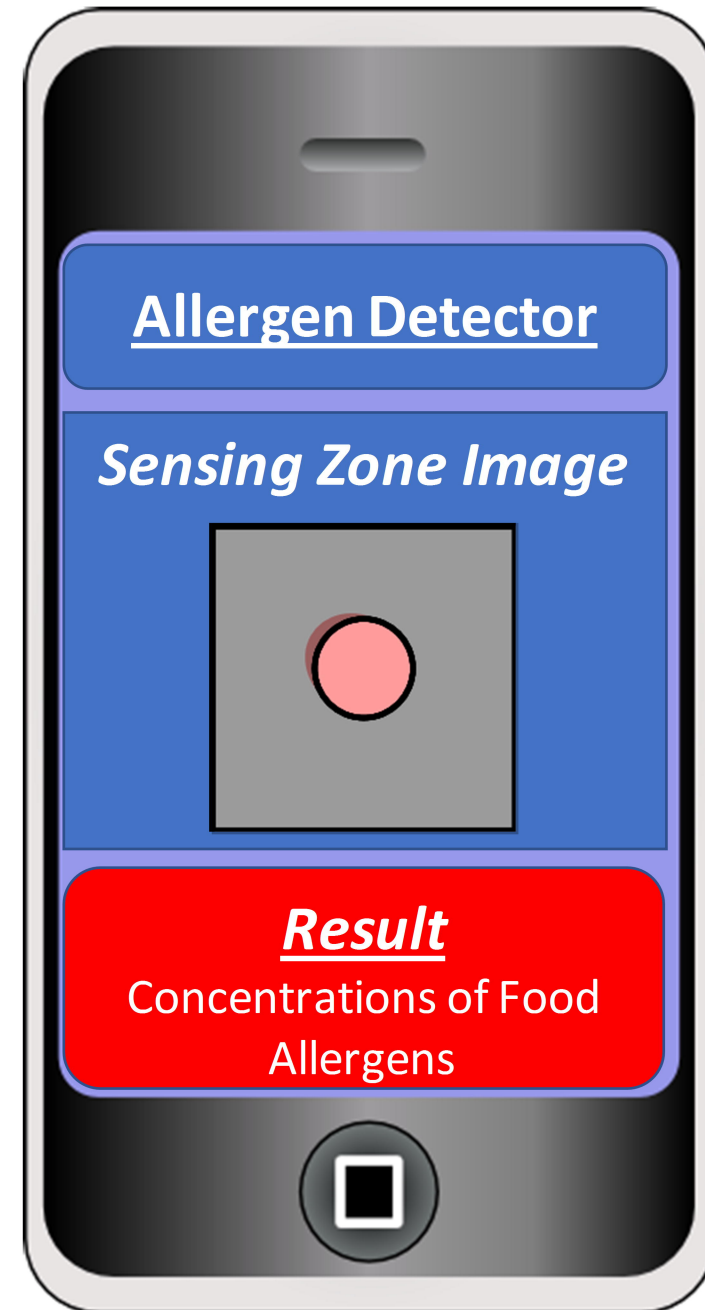

Allergen Detector

*Sensing Zone Image*

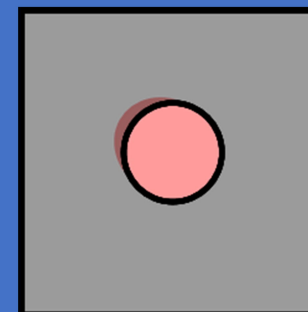

Result

Concentrations of Food  
Allergens

LoD: Ara h1- 7.8 nM  $\beta$ IG - 12.4 nM Tropomyosin-6.2 nM

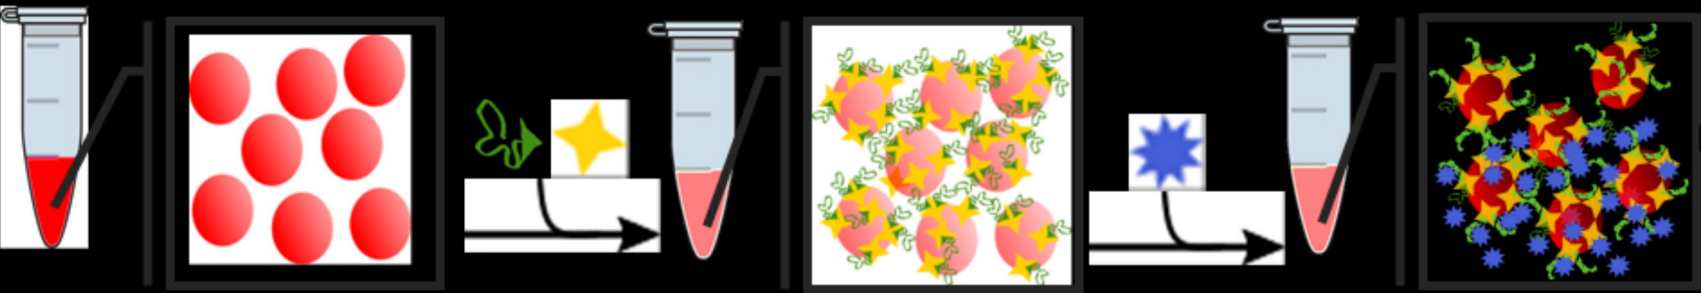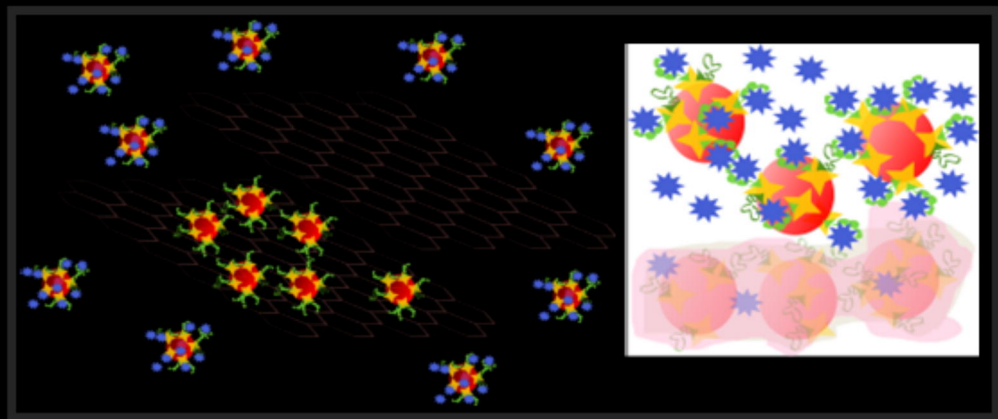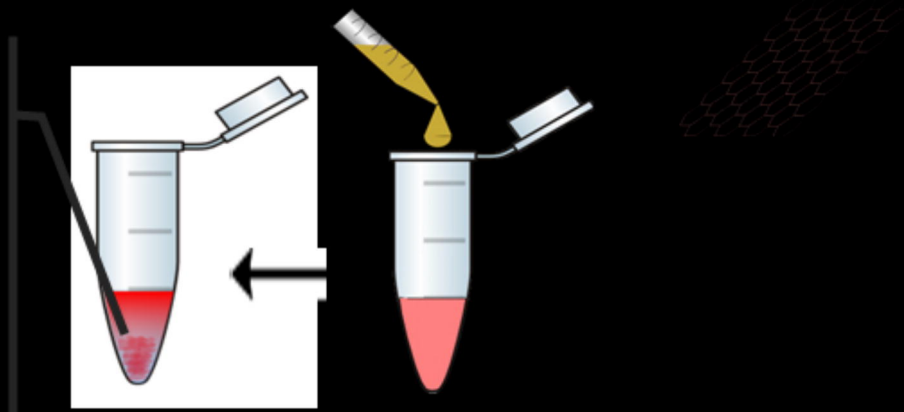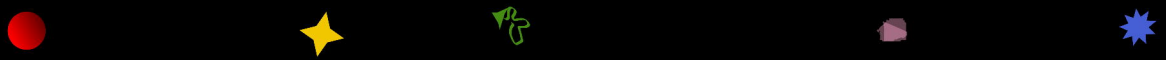

Source: https://www.biorxiv.org/content/10.1101/343368.full.pdf
